# Supplementary material for: Prevalence of polypharmacy in pregnancy: a systematic review
Source: PubMed Central journal article supplement (PMC9990613; doi:10.1136/bmjopen-2022-067585), 2023-03-06
Supplement: bmjopen-2022-067585supp001.pdf [file bmjopen-2022-067585supp001.pdf]

## Appendix 1 – Search strategy

The search strategy for Embase and MEDLINE is shown below.

1. polypharmacy/
2. multiple medicatio\*.mp.
3. multiple medicine\*.mp.
4. multiple drug\*.mp.
5. many medicatio\*.mp.
6. many medicine\*.mp.
7. many drug\*.mp.
8. (more adj4 medication\*).mp.
9. polydrug\*.mp.
10. polymedication.mp.
11. polypharmacy.mp.
12. multi-drug therapy.mp.
13. multidrug therapy.mp.
14. multiple pharmacotherapy.mp.
15. poly pharmacy.mp.
16. polypragmasia.mp.
17. polypragmasia.mp.
18. exp pregnancy/
19. exp Pregnancy Complications/ or exp Pregnancy Disorders/
20. pregnan\*.mp.
21. mothers/
22. perinatal.mp.
23. maternal.mp.
24. obstetric\*.mp.
25. or/1-17
26. or/18-24
27. 25 and 26
