# Supplementary material for: Prevalence of polypharmacy in pregnancy: a systematic review
Source: PubMed Central journal article supplement (PMC9990613; doi:10.1136/bmjopen-2022-067585), 2023-03-06
Supplement: bmjopen-2022-067585supp003.pdf [file bmjopen-2022-067585supp003.pdf]

Table S1- Summary of Newcastle-Ottawa Quality Assessment Scale Score for Included Studies

| Author                      | Selection                        |                            | Outcome                    |                           |                       |
|-----------------------------|----------------------------------|----------------------------|----------------------------|---------------------------|-----------------------|
|                             | Representativeness of the cohort | Ascertainment of pregnancy | Assessment of polypharmacy | Was follow-up long enough | Adequacy of follow-up |
| <b>Buitendijk 1991 (29)</b> | *                                | *                          | -                          | *                         | *                     |
| <b>Olesen 1998 (31)</b>     | *                                | *                          | *                          | *                         | *                     |
| <b>Gomes 1999 (22)</b>      | *                                | *                          | -                          | *                         | *                     |
| <b>Malm 2004 (24)</b>       | *                                | *                          | *                          | *                         | *                     |
| <b>Schirm 2004 (32)</b>     | *                                | -                          | *                          | *                         | *                     |
| <b>Refuerzo 2005 (21)</b>   | *                                | *                          | -                          | *                         | *                     |
| <b>Cleary 2010 (26)</b>     | *                                | *                          | -                          | *                         | *                     |
| <b>Mitchell 2011 (27)</b>   | *                                | *                          | -                          | *                         | *                     |
| <b>Van Gelder 2014 (20)</b> | *                                | -                          | *                          | *                         | *                     |
| <b>Tinker 2016 (23)</b>     | -                                | -                          | -                          | *                         | *                     |
| <b>Haas 2018 (6)</b>        | *                                | *                          | -                          | *                         | *                     |
| <b>Ingstrup 2018 (24)</b>   | *                                | *                          | *                          | *                         | *                     |
| <b>Zhang 2019 (27)</b>      | *                                | *                          | *                          | *                         | *                     |
| <b>Obadeji 2020 (29)</b>    | *                                | *                          | *                          | *                         | *                     |

\* Indicates adequate quality in domain. A maximum of one star can be given for each domain
